# Supplementary material for: Collagen IV and basement membrane at the evolutionary dawn of metazoan tissues
Source: eLife. 2017 Apr 18;6:e24176. doi: 10.7554/eLife.24176 (PMC5395295; doi:10.7554/eLife.24176)
Supplement: Figure 3—figure supplement 1—source data 1. — DOI: http://dx.doi.org/10.7554/eLife.24176.008 [file elife-24176-fig3-figsupp1-data1.xlsx]

## Sheet: Exon Length Frequency
Figure 3 - figure supplement 1 - source data 1
ML Exon Length	Frequency
57	2
59	2
63	1
64	1
65	1
70	1
71	1
73	1
75	1
78	1
80	2
81	1
82	1
83	1
85	1
89	2
90	2
93	1
95	1
97	3
100	5
101	3
102	1
103	1
106	1
108	4
109	1
111	1
113	2
116	2
117	2
119	1
120	1
123	1
124	1
125	2
126	2
127	5
129	2
130	2
131	2
132	2
133	3
134	1
135	2
137	1
138	2
140	2
141	4
142	2
143	2
144	5
145	2
146	2
148	1
149	2
151	3
152	3
153	7
154	1
155	1
156	3
157	1
158	1
162	1
163	2
165	5
166	1
167	1
169	1
170	2
171	2
173	1
176	8
179	2
180	1
181	1
183	3
184	1
186	1
187	1
188	1
189	1
192	1
193	1
194	3
195	2
197	1
198	2
199	3
203	2
205	1
207	2
208	3
210	1
214	1
216	1
225	1
230	1
234	4
242	2
244	1
245	2
248	3
250	2
251	1
253	2
255	5
256	1
258	1
259	1
262	1
265	3
267	2
273	2
278	1
279	2
282	1
285	1
287	3
288	2
291	2
294	1
298	2
300	1
301	1
307	1
331	1
380	1
411	1
438	1
456	2
516	1
637	1
640	1
650	1
778	1
837	2
840	1
849	1
1122	1
4762	1
