# Supplementary material for: Collagen IV and basement membrane at the evolutionary dawn of metazoan tissues
Source: eLife. 2017 Apr 18;6:e24176. doi: 10.7554/eLife.24176 (PMC5395295; doi:10.7554/eLife.24176)
Supplement: Figure 3—figure supplement 1—source data 2. — Conserved exon lengths and positions are marked in red. DOI: http://dx.doi.org/10.7554/eLife.24176.009 [file elife-24176-fig3-figsupp1-data2.xlsx]

## Sheet: Exon Lengths
Figure 3 - figure supplement 1 - source data 2
	NC1		Group I					Group II								Human
	ML047918a		ML17502a	ML17503a	ML17501a	ML17504a		ML18175a	ML18197a	ML034336a	ML034334a	ML18198a	ML034337a	ML16441a		203
Exon 1	133		438	140	120	40		57	142	154	151	145	132	127		60
Exon 2	173		97	116	108	143		89	152	152	156	152	73	153		90
Exon 3	137		146	129	307	145		245	141	153	149	83	251	108		45
Exon 4	169		214	155	278	125		4762	640	141	778	650	142	75		45
Exon 5	102		230	153	97	181		111	210	637	207	195	81	126		63
Exon 6	192		411	180	146	125		63	255	207	255	255	135	176		54
Exon 7			285	144	109	117		156	234	255	234	234	248	124		27
Exon 8			456	127	186	153		143	840	198	837	849	279	165		84
Exon 9			288	123	149	90		179	176	837	176	176	100	244		63
Exon 10			291	65	208	64			259	176	253	256	255	216		36
Exon 11			331	195	203	116			165	253	162	165	71	126		42
Exon 12			203	171	127	106			194	162	194	197	163	189		87
Exon 13			133	234	158	78			258	194	298	301	1122	184		27
Exon 14			156	282	456	80			262	298	101	101	89	157		51
Exon 15			133	187	288	163			245	101	250	265	208	198		45
Exon 16			193	113	291	153			183	250	242	248	176	208		54
Exon 17			148	82	516	132			199	242	183	183	144	176		42
Exon 18			134	153	151	140			287	183	199	205	265	144		85
Exon 19			138	113	138	127			273	199	176	179	167	265		36
Exon 20				100	130	108				287	287	103	97	176		165
Exon 21				93	59	131				789	273	287	170	85		96
Exon 22				80	130	90					267	267	165	170		84
Exon 23					100	144							100	171		71
Exon 24						141							144	225		192
Exon 25						141							380	135		169
Exon 26						300							119	129		93
Exon 27						114							127	151		105
Exon 28						166							294	131		98
Exon 29						188								108		151
Exon 30						117								153		114
Exon 31						165								70		168
Exon 32						59								95		90
Exon 33						199										153
Exon 34																99
Exon 35																90
Exon 36																140
Exon 37																127
Exon 38																81
Exon 39																99
Exon 40																51
																186
																134
																73
																72
																129
																99
																213
																178
																115
																173
																1482
