# Supplementary material for: Collagen IV and basement membrane at the evolutionary dawn of metazoan tissues
Source: eLife. 2017 Apr 18;6:e24176. doi: 10.7554/eLife.24176 (PMC5395295; doi:10.7554/eLife.24176)
Supplement: Figure 3—source data 1. — DOI: http://dx.doi.org/10.7554/eLife.24176.006 [file elife-24176-fig3-data1.xlsx]

## Sheet: Gene Expression Data
Figure 3, Panel B - source data 1
Gene ID	RPKM
ML034336a	19685
ML034334a	15942
ML 034337a	12382
ML18198a	2017
ML164411a	887
ML18197a	283
ML18175a	178
ML17502a	13153
ML17501a	8609
ML17504a	4022
ML17503a	1097
ML47918a	3785
